# Supplementary material
Source: PubMed Central journal article supplement (PMC6585464)
Supplement: NIHMS1523260-supplement-1.pdf [file NIHMS1523260-supplement-1.pdf]

**Cell Reports, Volume 26**

**Supplemental Information**

**Human Pluripotent Stem Cell-Derived Multipotent  
Vascular Progenitors of the Mesothelium Lineage  
Have Utility in Tissue Engineering and Repair**

**Thomas Colunga, Miranda Hayworth, Sebastian Kreß, David M. Reynolds, Luoman Chen, Kristopher L. Nazor, Johannes Baur, Amar M. Singh, Jeanne F. Loring, Marco Metzger, and Stephen Dalton**

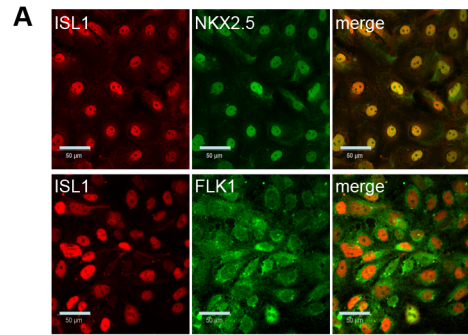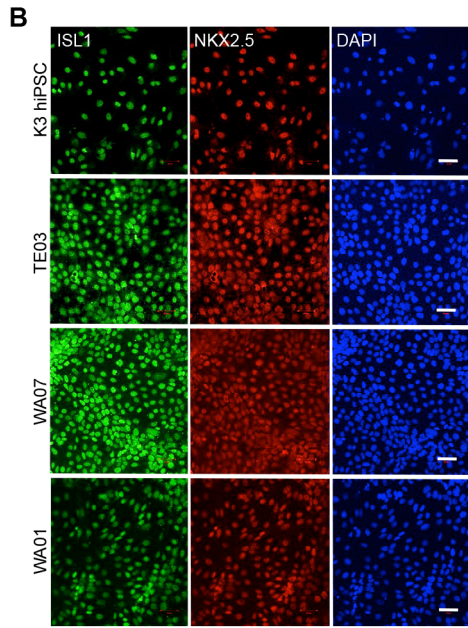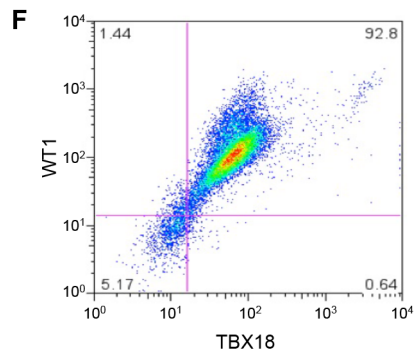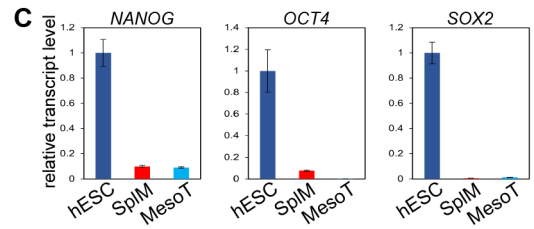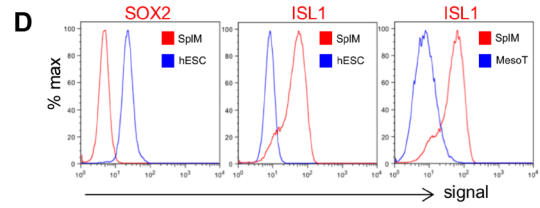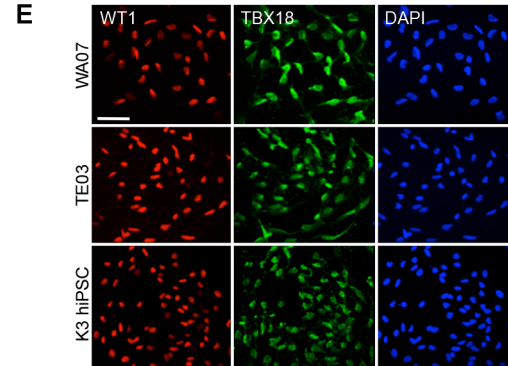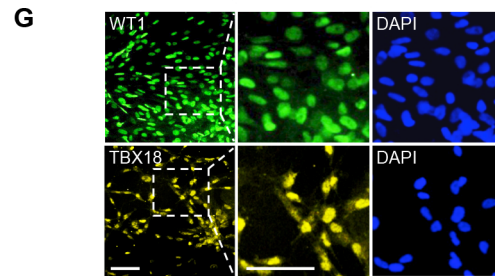

**Figure S1. Related to Figure 1.**

**(A)** hESC-derived (WA09) splanchnic mesoderm (SplM) cells generated after 4 days of culture in CDM supplemented with Wnt3a (25 ng/ml) and BMP4 (100 ng/ml) were fixed and stained with antibodies for ISL1, NKX2.5 and FLK1. Scale bars, 50  $\mu$ m.

**(B)** Immunofluorescence analysis of K3 hiPSCs and hESCs (TE03, WA07 and WA01) cultured and stained as in **(A)**. Nuclei were counter stained with DAPI. Scale bars, 50  $\mu$ m.

**(C)** qRT-PCR data showing fold-change of transcript levels for pluripotency markers (*NANOG*, *OCT4* and *SOX2*) in SplM and MesoTs relative to hESCs. TaqMan assays for each transcript were performed in technical triplicate and fold-change shown relative to hESCs (WA09) after normalization with 18S RNA.

**(D)** Flow cytometry data of untreated hESCs (WA09), SplM, and MesoT showing the absence of the pluripotent marker SOX2 (left plot) and presence of lineage specific marker ISL1 (middle plot) in SplM. As cells transition to MesoT, ISL1 is downregulated (right plot).

**(E)** Immunofluorescence of WA07, TE03 and K3 hiPSC lines after differentiation of SplM to MesoT followed by probing with WT1 and TBX18 antibodies. Nuclei were counter stained with DAPI. Scale bar, 50  $\mu$ m.

**(F)** Flow cytometry pseudocolor plot of MesoT cells probed with antibodies for WT1 and TBX18.

**(G)** WA09-derived MesoT cells were fixed and probed with antibodies for lineage specific markers WT1 and TBX18. Nuclei were counterstained with DAPI. Right hand side is a magnification of the insets from left. Scale bars, 50  $\mu$ m.

Error bars  $\pm$  standard deviation.

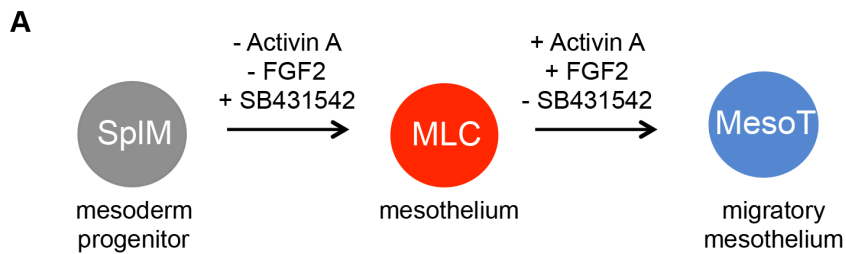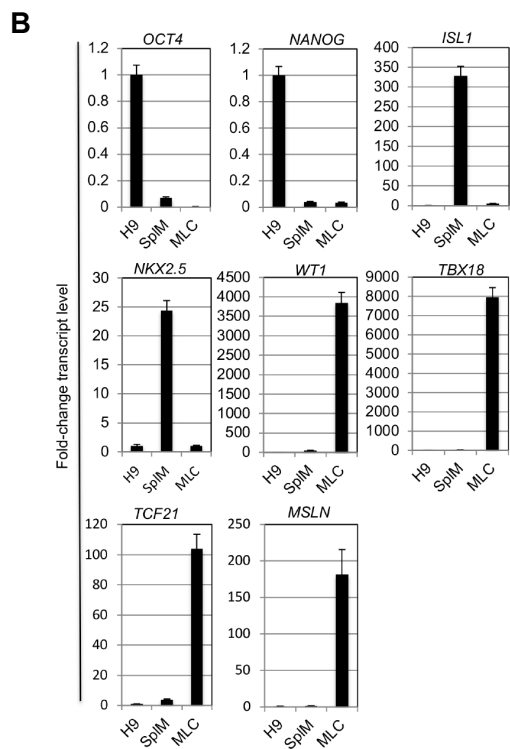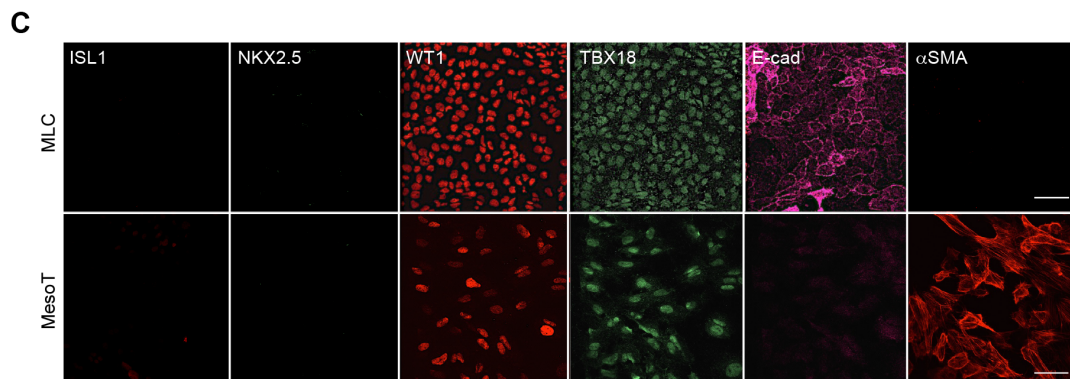

**Figure S2. Related to Figure 1.**

**(A)** Schematic showing the progression of splanchnic mesoderm (SplM) to mesothelium-like cells (MLCs) and then MesoTs. Removal and addition of growth factors and inhibitors are indicated above the arrows for each stage.

**(B)** qRT-PCR data showing fold-change of transcript levels for pluripotency (*OCT4*, *NANOG*), SplM (*ISL1* and *NKX2.5*) and mesothelium (*WT1*, *TBX18*, *TCF21* and *MSLN*). TaqMan assays for each transcript were performed in technical triplicate and fold-change shown relative to untreated hESCs (WA09) after normalization with 18S RNA.

**(C)** Immunofluorescence analysis of MLCs and MesoTs directly derived from MLCs. After EMT induction of MLCs **(A)**, cells become migratory but retain expression of mesothelial lineage markers. Cells were fixed and stained with antibodies against ISL1, NKX2.5, WT1, TBX18, E-cadherin (epithelial marker) and alpha smooth muscle actin ( $\alpha$ SMA). Scale bars, 50  $\mu$ m. Error bars  $\pm$  standard deviation.

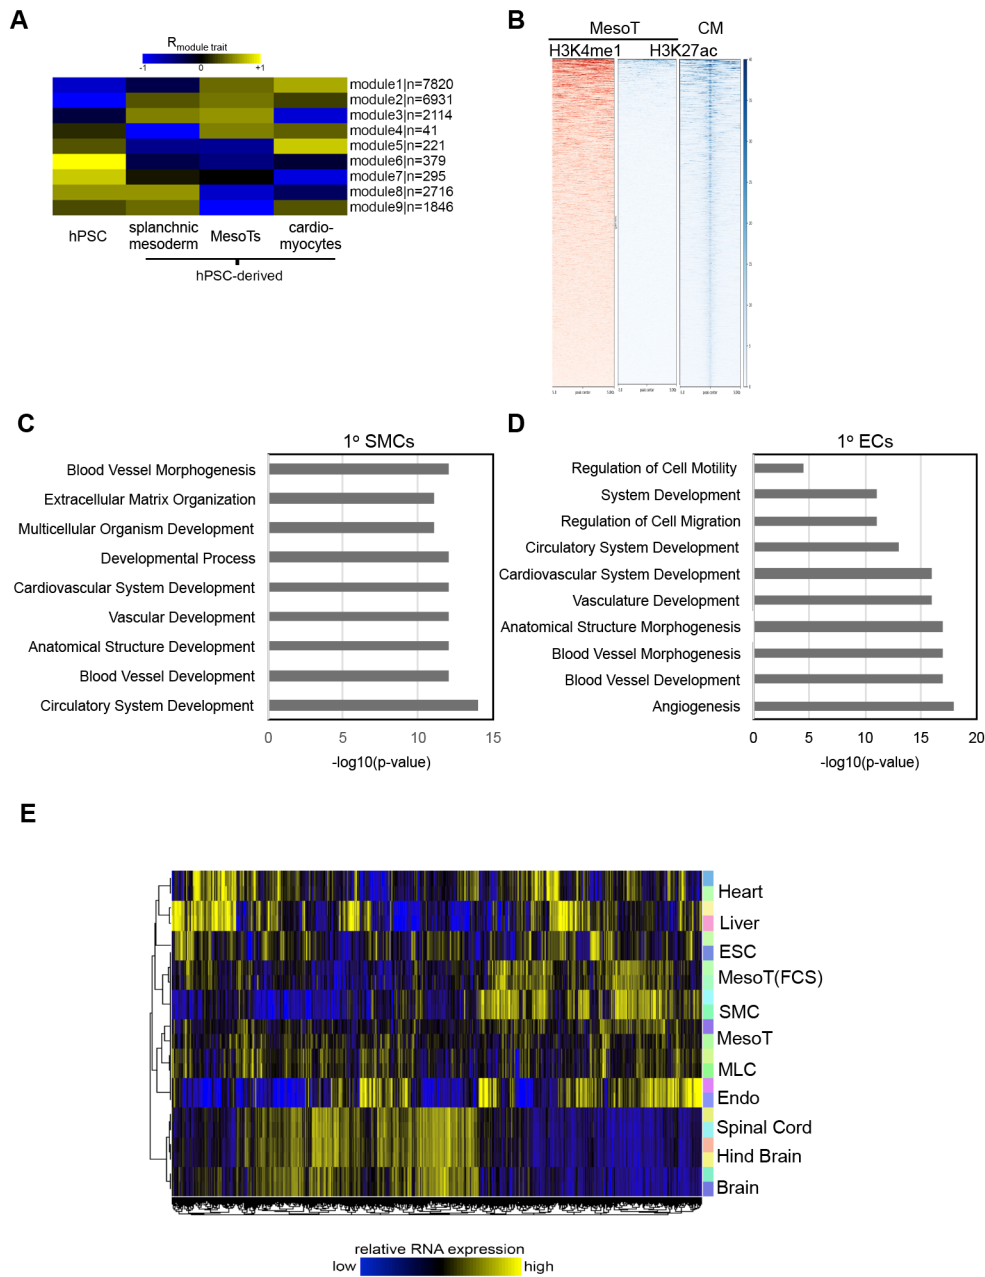

**Figure S3. Related to Figure 2.**

(A) Heatmap showing the relationship between cell type-specific DNA methylation modules (WA09) hPSCs, hPSC-derived splanchnic mesoderm, MesoTs and hPSC-derived cardiomyocytes. Module 9 comprises 1846 cytosines and is characteristic of MesoTs.

(B) Heatmap showing highly enriched H3K27ac (blue) lineage specific sites in hESC-derived cardiomyocytes (CM) and the absence of H3K4me1 in corresponding sites for MesoT.

(C and D) Gene Ontology analysis of genes analyzed in Figure 2D.

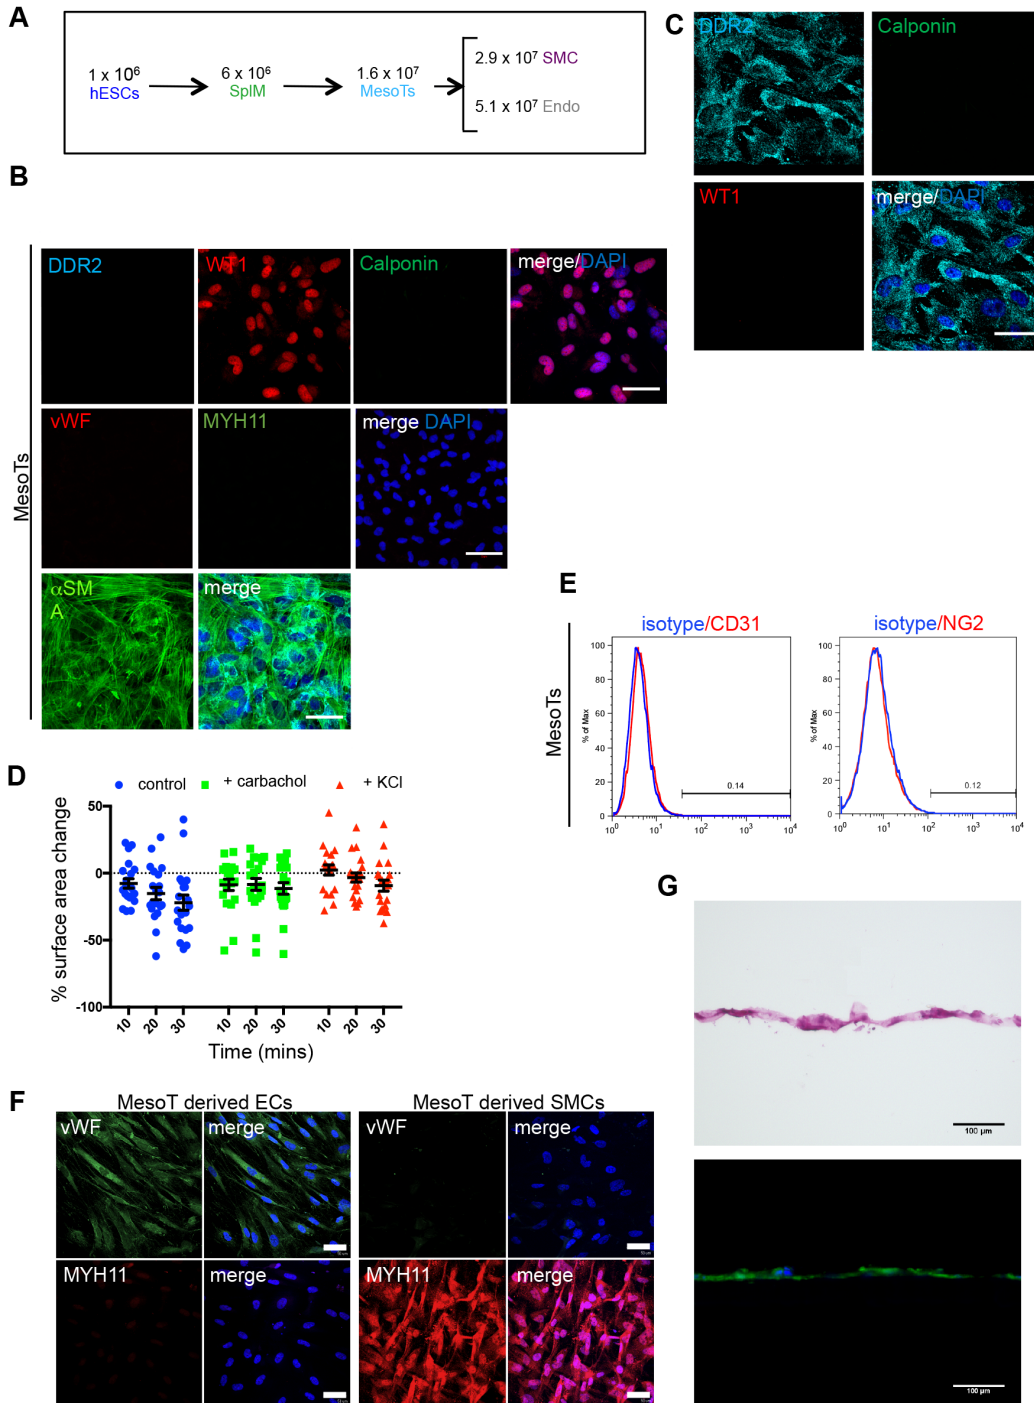

**Figure S4. Related to Figures 3 and 4.**

**(A)** Cells numbers at different stages of differentiation are shown. Cell number was counted at each stage after plating 1 million hESCs (WA09).

**(B)** Immunofluorescence of MesoT cells probed with lineage specific antibodies for mesothelium (WT1), smooth muscle (calponin, MYH11), endothelium (vWF), or fibroblasts (DDR2). Nuclei were counterstained with DAPI. Scale bar, 50  $\mu\text{m}$ .

**(C)** MesoT-derived Fibroblasts on day 12 were probed with antibodies for WT1, DDR2, calponin and counterstained with DAPI. Scale bar, 50  $\mu\text{m}$ .

**(D)** Contraction assays as for Figure 3 except performed on WA09 hESCs. Contraction is shown as the % change in cell surface area for individual cells. Each treatment group was compared to corresponding control time point to determine statistical significance. N=20.

**(E)** Flow cytometry histograms of MesoT cells probed with antibodies for CD31 (endothelium), NG2 (pericyte), and isotype control.

**(F)** Immunofluorescence of MesoT (FBS) cells after culturing with 2% FBS +VEGF (endothelium) or +PDGF-BB (SMC). Cells were fixed and probed with antibodies against vWF or MYH11 and counter stained with DAPI. Scale bars, 50  $\mu\text{m}$ .

**(G)** Magnified images shown in Figure 3J. Scale bar, 100  $\mu\text{m}$ .



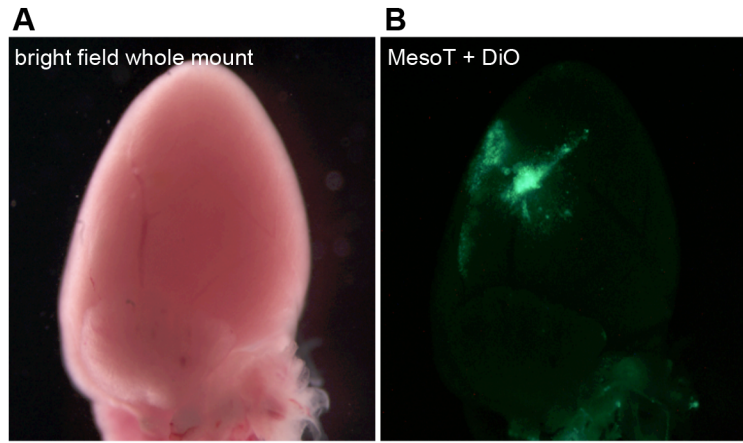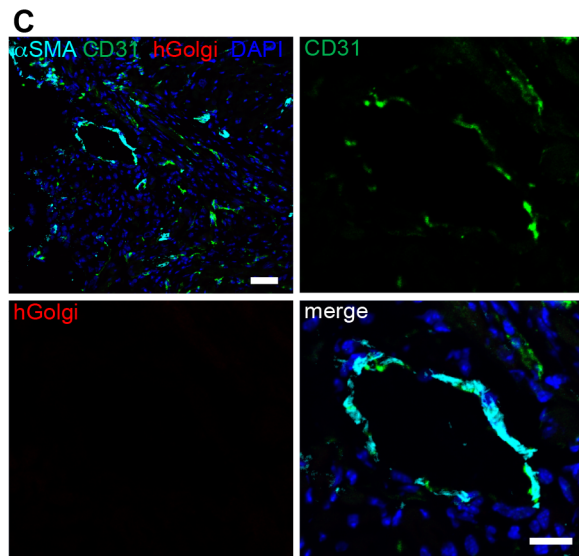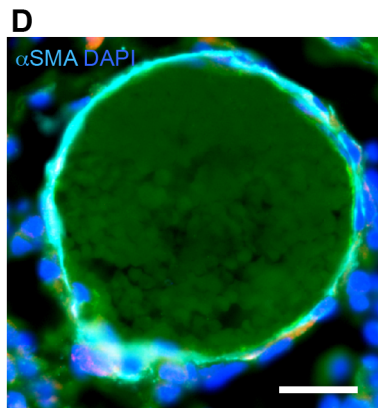

**Figure S5. Related to Figure 5.**

- (A) Whole mount image of a mechanically injured heart 5 days after resecting part of the ventricle.
- (B) DiO labeled MesoT human cells (green) were applied immediately after resection and attached to injured area. Micron bar, 1 mm.
- (C) Immunohistochemistry image showing the absence of hGolgi<sup>+</sup> cells in the repair zone of neonatal hearts that did not receive MesoT cells following mechanical injury. The section was also probed with antibodies for  $\alpha$ -smooth muscle actin ( $\alpha$ SMA), CD31 and counterstained with DAPI. Scale bar, 50  $\mu$ m.
- (D) Blood vessel from **Figure 5D** showing the presence of erythrocytes due to autofluorescence. Scale bar, 20  $\mu$ m.

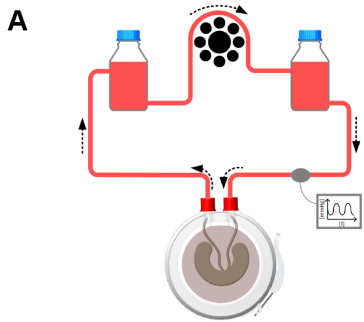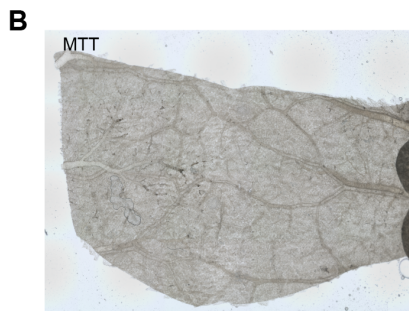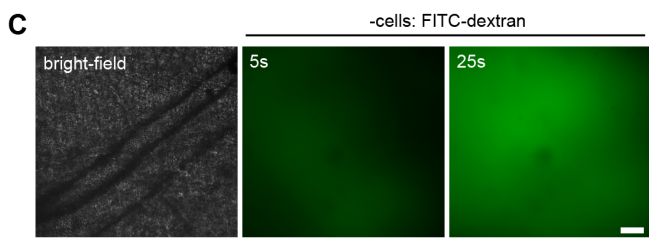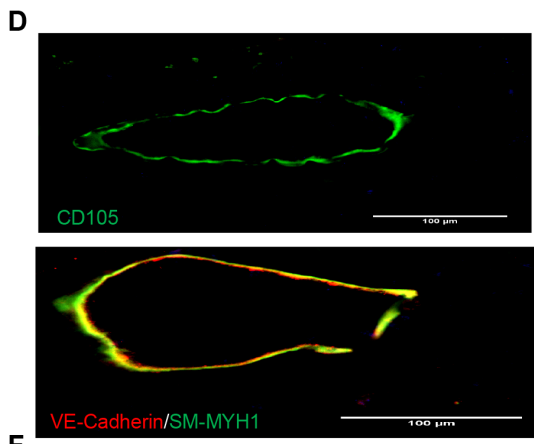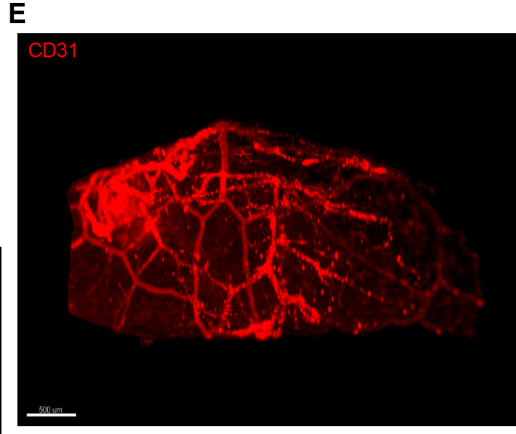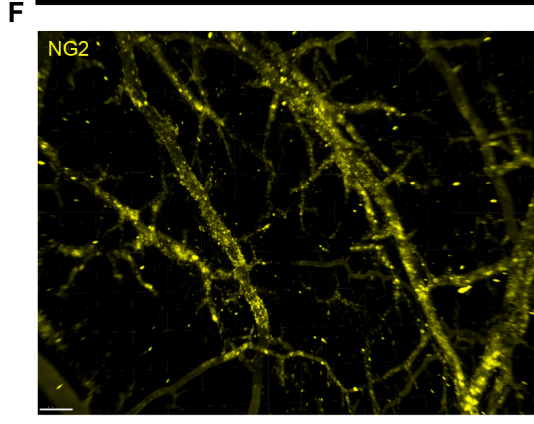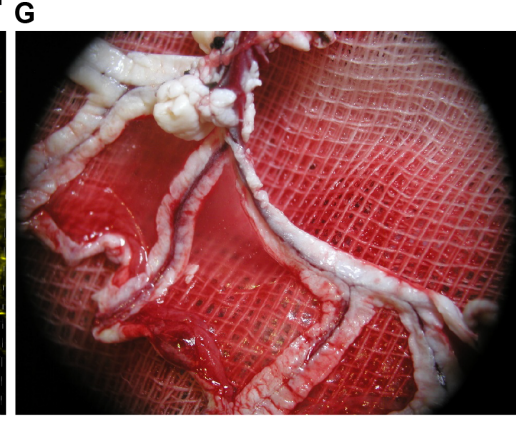

**Figure S6. Related to Figure 6.**

**(A)** Basic bioreactor design showing media vessels, pump, pressure sensors, and the inflow/outflow ports that circulate perfused media through the vascular bed.

**(B)** MTT assay of a decellularized construct showing the absence of viable cells.

**(C)** Left panel; bright field image before FITC-dextran perfusion. Time lapse images 5 and 25 seconds after FITC-dextran perfusion into decellularized scaffolds seeded at low density with MesoTs. Scale bar, 100  $\mu\text{m}$ .

**(D and E)** Light sheet microscopy images as in **Figure 6J** showing CD31<sup>+</sup> endothelium lining recellularized jejunal scaffolds after 28 days. Scale bars, 500  $\mu\text{m}$ .

**(F)** Light sheet microscopy image showing NG2<sup>+</sup> pericytes lining MesoT-seeded vessels. Scale bar, 150  $\mu\text{m}$ .

**(G)** Gross anatomy image as in **Figure 6L** after harvesting of anastomosed tissue.

**Table S2 List of Antibodies. Related to STAR Methods.**

| <b>Antibody</b>                                                                 | <b>Application</b> | <b>Supplier</b>          | <b>Identifier</b>                    |
|---------------------------------------------------------------------------------|--------------------|--------------------------|--------------------------------------|
| Goat Polyclonal anti-Islet-1                                                    | IF                 | R&D systems              | Cat#AF1837;<br>RRID:AB_2126324       |
| Mouse Monoclonal anti-Nkx2.5 (Clone 259416)                                     | IF                 | R&D Systems              | Cat#MAB2444;<br>RRID:AB_2151378      |
| Goat Polyclonal anti-E-cadherin                                                 | IF                 | R&D Systems              | Cat#AF648;<br>RRID:AB_355504         |
| Mouse Monoclonal anti-TBX18 (Clone 635305)                                      | IF                 | R&D Systems              | Cat#MAB63371;<br>RRID:AB_10892533    |
| Rabbit Polyclonal anti-Flk1-1                                                   | IF                 | Acris Antibodies GmbH    | Cat# AP02618PU-S;<br>RRID:AB_1624459 |
| Goat Polyclonal anti-SOX2 (Clone Y-17)                                          | IF                 | Santa Cruz Biotechnology | Cat#sc-17320;<br>RRID:AB_2286684     |
| Mouse Monoclonal anti-ZO-1 (Clone 1)                                            | IF                 | BD Biosciences           | Cat#610966;<br>RRID:AB_398279        |
| Goat Polyclonal anti-DDR2 (N-20)                                                | IF                 | Santa Cruz Biotechnology | Cat#sc-7555;<br>RRID:AB_639054       |
| Mouse Monoclonal anti-Calponin                                                  | IF                 | Sigma-Aldrich            | Cat#C2687;<br>RRID:AB_476840         |
| Mouse Monoclonal anti-smooth muscle Myosin heavy chain 11 antibody (Clone 1G12) | IF                 | Abcam                    | Cat#ab683;<br>RRID:AB_2235569        |
| Rabbit Polyclonal anti-von Willebrand Factor                                    | IF                 | Dako                     | Cat#A0082;<br>RRID:AB_2315602        |
| Rabbit Monoclonal anti-Wilms Tumor Protein (Clone CAN-R9(IHC)-56-2)             | IF, IHC            | Abcam                    | Cat#ab89901;<br>RRID:AB_2043201      |
| Mouse Monoclonal anti-alpha Smooth Muscle Actin (Clone 1A4)                     | IF, IHC            | Abcam                    | Cat#ab7817;<br>RRID:AB_262054        |
| Rabbit Polyclonal anti-alpha Smooth Muscle Actin                                | IF, IHC            | Abcam                    | Cat#ab5694;<br>RRID:AB_2223021       |
| Rabbit Monoclonal anti-Vimentin (Clone EPR3776)                                 | IF, IHC            | Abcam                    | Cat#ab92547;<br>RRID:AB_10562134     |
| Mouse Monoclonal anti-CD31 (Clone JC70A)                                        | IF, IHC            | Dako                     | Cat#M0823;<br>RRID:AB_2114471        |
| Mouse Monoclonal anti-NG2                                                       | IF, IHC            | Abcam                    | Cat#ab83508;<br>RRID:AB_2087616      |
| Donkey Polyclonal anti-Mouse IgG (H+L) Alexa Fluor 488 Conjugated               | IF, IHC            | Thermo Fisher            | Cat#:A21202;<br>RRID:AB_141607       |
| Donkey Polyclonal anti-Rabbit IgG (H+L) Alexa Fluor 488 Conjugated              | IF, IHC            | Thermo Fisher            | Cat#A21206;<br>RRID:AB_141708        |
| Donkey Polyclonal anti-Goat IgG (H+L) Alexa Fluor 555 Conjugated                | IF, IHC            | Thermo Fisher            | Cat#A21432;<br>RRID:AB_141788        |
| Donkey Polyclonal anti-Mouse IgG (H+L) Alexa Fluor 555 Conjugated               | IF, IHC            | Thermo Fisher            | Cat#A31570;<br>RRID:AB_2536180       |
| Donkey Polyclonal anti-Rabbit IgG (H+L) Alexa Fluor 555 Conjugated              | IF, IHC            | Thermo Fisher            | Cat#A31572;<br>RRID:AB_162543        |
| Donkey Polyclonal anti-Goat IgG (H+L) Alexa Fluor 647 Conjugated                | IF, IHC            | Thermo Fisher            | Cat#A21447;<br>RRID:AB_141844        |
| Donkey Polyclonal anti-Rabbit IgG (H+L) Alexa Fluor 647 Conjugated              | IF, IHC            | Thermo Fisher            | Cat#A31573;<br>RRID:AB_2536183       |
| Donkey Polyclonal anti-Sheep IgG (H+L) Alexa Fluor 647 Conjugated               | IHC                | Thermo Fisher            | Cat#A21448;<br>RRID:AB_2535865       |

|                                                                                            |      |                |                                     |
|--------------------------------------------------------------------------------------------|------|----------------|-------------------------------------|
| Rabbit Polyclonal anti-CD31                                                                | IHC  | Abcam          | Cat#ab28364;<br>RRID:AB_726362      |
| Sheep Polyclonal anti-Human TGN46<br>(Human Golgi)                                         | IHC  | AbD Serotec    | Cat#AHP500G;<br>RRID:AB_323104      |
| Mouse Monoclonal anti-Nuclei (Human<br>Nuclear Antigen) (Clone 235-1)                      | IHC  | Millipore      | Cat#MAB1281;<br>RRID:AB_94090       |
| Mouse Monoclonal anti-NG2/MCSP<br>Phycoerythrin Conjugated (Clone LHM-2)                   | FC   | R&D Systems    | Cat#FAB2585P;<br>RRID:AB_2087615    |
| Rabbit Polyclonal anti-VE-cadherin                                                         | FC   | Abcam          | Cat#ab33168;<br>RRID:AB_870662      |
| Mouse Monoclonal anti-CD31 BD<br>Horizon™ BV421 Conjugated (Clone<br>WM59)                 | FC   | BD Biosciences | Cat#564089;<br>RRID:AB_2714010      |
| Mouse Monoclonal anti-CD73<br>Phycoerythrin Conjugated (Clone AD2)                         | FC   | BD Biosciences | Cat# 550257;<br>RRID:AB_393561      |
| Rat Monoclonal anti-CD44<br>Allophycocyanin Conjugated (Clone IM7)                         | FC   | eBioscience    | Cat# 17-0441-82;<br>RRID:AB_469390  |
| Mouse Monoclonal anti-CD105 BD<br>Horizon™ BV421 Conjugated (Clone 266)                    | FC   | BD Biosciences | Cat# 563920;<br>RRID:AB_2722606     |
| Mouse Monoclonal IgG1 kappa Isotype<br>Control BD Horizon™ BV421<br>Conjugated (Clone X40) | FC   | BD Biosciences | Cat#562438;<br>RRID:AB_11207319     |
| Rat IgG2b kappa Isotype Control<br>Allophycocyanin Conjugated (Clone<br>eB149/10H5)        | FC   | eBioscience    | Cat#17-4031-82;<br>RRID:AB_470176   |
| Mouse Monoclonal IgG1 kappa Isotype<br>Control Phycoerythrin Conjugated (Clone<br>MOPC-21) | FC   | BD Biosciences | Cat#555749;<br>RRID:AB_396091       |
| Mouse IgG1 kappa Isotype Control<br>Allophycocyanin Conjugated (Clone<br>P3.6.2.8.1)       | FC   | eBioscience    | Cat# 17-4714-42,<br>RRID:AB_1603315 |
| Mouse IgG1 Isotype Control<br>Allophycocyanin Conjugated (Clone<br>11711)                  | FC   | R&D Systems    | Cat#IC002A;<br>RRID:AB_357239       |
| Anti-Histone H3 (mono methyl K4)<br>antibody – ChIP Grade                                  | ChIP | Abcam          | Cat#ab8895;<br>RRID:AB_306847       |
| Mouse monoclonal anti-CD105 (clone<br>SN6)                                                 | IF   | Abcam          | Cat#ab11414;<br>RRID: AB_298019     |
| Rabbit polyclonal anti-VE-<br>Cadherin(CD144)                                              | IF   | Signma-Aldrich | Cat#V1514;<br>RRID: AB_477609       |
| Mouse monoclonal anti-fast myosin<br>skeletal heavy chain antibody (Clone<br>MY32)         | IF   | Abcam          | Cat#ab51263;<br>RRID: AB_2297993    |
| Anti-Histone H3 (acetyl K27) antibody –<br>ChIP Grade                                      | ChIP | Abcam          | Cat#ab4729;<br>RRID:AB_2118291      |

- Key: IF – immunofluorescence, IHC – immunohistochemistry, FC – flow cytometry, ChIP – chromatin immunoprecipitation

**Table S3 Taqman Primers for qRT-PCR. Related to STAR Methods.**

| <b>Gene</b> | <b>Supplier</b> | <b>Identifier</b> | <b>Chromosome Location</b>        |
|-------------|-----------------|-------------------|-----------------------------------|
| POU5F1/OCT4 | Thermo Fisher   | Hs04260367_gH     | Chr.6: 31164337 - 31170693        |
| SOX2        | Thermo Fisher   | Hs01053049_s1     | Chr.3: 181711924 - 181714436      |
| NANOG       | Thermo Fisher   | Hs02387400_g1     | Chr.12: 7789396 - 7796061         |
| ISL1        | Thermo Fisher   | Hs00158126_m1     | Chr.5: 51383124 - 51394730        |
| NKX2.5      | Thermo Fisher   | Hs00231763_m1     | Chr.5: 173232104 - 173235312      |
| GATA4       | Thermo Fisher   | Hs00171403_m1     | Chr.8: 11676919 - 11760002        |
| WT1         | Thermo Fisher   | Hs01103751_m1     | Chr.11: 32387775 - 32435535       |
| TBX18       | Thermo Fisher   | Hs01385457_m1     | Chr.6: 84666834 - 84764236        |
| TCF21       | Thermo Fisher   | Hs00162646_m1     | Chr.6: 133889121 - 133895537      |
| MSLN        | Thermo Fisher   | Hs00245879_m1     | Chr.16: 760746 - 768865           |
| RNA18S5     | Thermo Fisher   | Hs03928985_g1     | Chr.Un NT 167214: 109078 - 110946 |
